# Supplementary material for: Optimization of Gentisides Extraction fromGentiana rigescensFranch. ex Hemsl. by Response Surface Methodology
Source: Hindawi journal article supplement (doi:10.1155/2015/819067), 2015-01-01
Supplement: f1 [file 819067.f1.pdf]

## Supplementary Material

### Supplementary Material 1: Structures of gentisides A, B, G, H, I, J and K

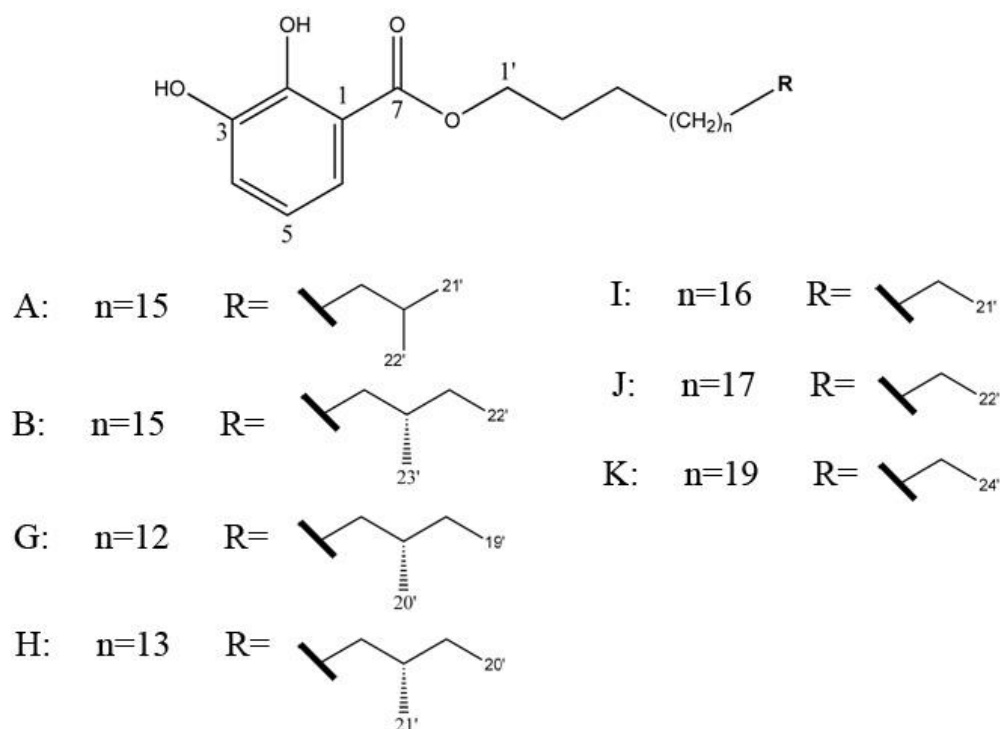

### Supplementary Material 2: The actual and coded values of the independent variables

| independent variables                  | coded values |    |    |
|----------------------------------------|--------------|----|----|
|                                        | -1           | 0  | 1  |
| extraction temperature ( $X_1$ : °C)   | 65           | 75 | 85 |
| extraction time ( $X_2$ : h)           | 2            | 3  | 4  |
| solvent-material ratio ( $X_3$ : mL/g) | 8            | 10 | 12 |

Supplementary Material 3: Linearity and Precision of Gentiside A, B, G, H, I, J and K

| Analytes.   | Regression Equation | Correlation Coefficient ( $R^2$ ) | Linear ranges           |
|-------------|---------------------|-----------------------------------|-------------------------|
|             |                     |                                   | ( $\text{mg mL}^{-1}$ ) |
| gentiside A | $Y=735.88x+0.9700$  | 0.9994                            | 0.500-0.010             |
| gentiside B | $Y=446.81x-2.2227$  | 0.9976                            | 0.500-0.010             |
| gentiside G | $Y=419.66x-0.1712$  | 0.9988                            | 0.500-0.010             |
| gentiside H | $Y=655.49x+2.2037$  | 0.9989                            | 1.000-0.010             |
| gentiside I | $Y=630.77x+1.2064$  | 0.9987                            | 0.500-0.010             |
| gentiside J | $Y=417.80x+2.1768$  | 0.9985                            | 1.000-0.010             |
| gentiside K | $Y=130.69x-0.1592$  | 0.9995                            | 0.500-0.010             |

Supplementary Material 4: RSD values of precision, stability and repeatability in HPLC methodology validation experiment

| Analytes.   | Precisions RSD (%) |           | Stability RSD (%) | Reproducibility RSD (%) |
|-------------|--------------------|-----------|-------------------|-------------------------|
|             | Intra-day          | Inter-day |                   |                         |
| gentiside A | 0.95               | 1.85      | 2.38              | 2.56                    |
| gentiside B | 1.21               | 1.93      | 2.57              | 2.17                    |
| gentiside G | 0.77               | 1.39      | 1.74              | 1.57                    |
| gentiside H | 0.99               | 1.64      | 1.99              | 1.70                    |
| gentiside I | 1.35               | 2.14      | 2.77              | 2.33                    |
| gentiside J | 0.57               | 0.93      | 1.07              | 1.49                    |
| gentiside K | 2.06               | 2.58      | 2.58              | 2.79                    |
